# Supplementary material for: Monosynaptic Stretch Reflex Fails to Explain the Initial Postural Response to Sudden Lateral Perturbations
Source: Front Hum Neurosci. 2017 Jun 7;11:296. doi: 10.3389/fnhum.2017.00296 (PMC5461337; doi:10.3389/fnhum.2017.00296)
Supplement: Supplementary file 1 [file DataSheet1.XLSX]

## Sheet: Effect of the perturbation side
		Contralateral muscle latency [ms]
		left perturbation					right perturbation
					95% confidence interval					95% confidence interval
	muscle	mean	SD	SEM	lower bound	upper bound	mean	SD	SEM	lower bound	upper bound	post-hoc
	RA	39.1154	9.06034	2.51	33.64	44.59	45.8077	9.40864	2.61	40.12	51.49	ns
	OE	35.5769	7.3622	2.04	31.13	40.03	33.9615	7.74452	2.15	29.28	38.64	ns
	OI	57.8846	11.7901	3.27	50.76	65.01	67.1923	18.7356	5.2	55.87	78.51	ns
	ES1	48.4615	21.513	5.97	35.46	61.46	52.6154	27.9934	7.76	35.7	69.53	ns
	ES2	57.8077	29.5448	8.19	39.95	75.66	62.4615	35.8785	9.95	40.78	84.14	ns
	MF1	87.9231	41.7816	11.59	62.67	113.17	74.3846	36.1646	10.03	52.53	96.24	ns
	MF2	72.5	53.9297	14.96	39.91	105.09	71.0385	36.0008	9.98	49.28	92.79	ns
		Ipsilateral muscle latency [ms]
		left perturbation					right perturbation
					95% confidence interval					95% confidence interval
	muscle	mean	SD	SEM	lower bound	upper bound	mean	SD	SEM	lower bound	upper bound	post-hoc
	RA	56.3077	22.2454	6.17	42.86	69.75	59.6923	12.935	3.59	51.88	67.51	ns
	OE	59.1154	17.3279	4.81	48.64	69.59	72.5769	16.8274	4.67	62.41	82.75	ns
	OI	85.8846	20.2486	5.62	73.65	98.12	86.7692	31.6956	8.79	67.62	105.92	ns
	ES1	88.3846	35.287	9.79	67.06	109.71	78.4615	37.0768	10.28	56.06	100.87	ns
	ES2	86.8846	39.47	10.95	63.03	110.74	77.6923	40.1987	11.15	53.4	101.98	ns
	MF1	62.7308	20.6868	5.74	50.23	75.23	68.8846	24.272	6.73	54.22	83.55	ns
	MF2	67.5	25.8529	7.17	51.88	83.12	67.9615	20.1406	5.59	55.79	80.13	ns
	N=13
	Statistical analysis: Repeated-measures ANOVA: 2 x 2 x 7 test design with three within-subject factors: 'perturbation side' (left / right), 'muscle side' (ipsilateral / contralateral), and 'muscle' (RA / OE / OI / ES1 / ES2 / MF1 / MF2)

## Sheet: Effect of the muscle side
		Latency [ms]
		contralateral					ipsilateral
					95% confidence interval					95% confidence interval
	muscle	mean	SD	SEM	lower bound	upper bound	mean	SD	SEM	lower bound	upper bound	post-hoc
	RA	42.46	9.67153	1.9	38.56	46.37	58	17.9114	3.51	50.77	65.23	ns
	OE	34.77	7.4488	1.46	31.76	37.78	65.85	18.0874	3.55	58.54	73.15	p = 0,0006
	OI	62.54	16.0542	3.15	56.05	69.02	86.33	26.0618	5.11	75.8	96.85	p = 0,0353
	ES1	50.54	24.5515	4.81	40.62	60.46	83.42	35.8209	7.03	68.95	97.89	p = 0,0002
	ES2	60.13	32.2879	6.33	47.09	73.18	82.29	39.3116	7.71	66.41	98.17	p = 0,0812
	MF1	81.15	38.9021	7.63	65.44	96.87	65.81	22.3168	4.38	56.79	74.82	ns
	MF2	71.77	44.93	8.81	53.62	89.92	67.73	22.7065	4.45	58.56	76.9	ns
	N=13
	Statistical analysis: Repeated-measures ANOVA: 2 x 7 test design with two within-subject factors: 'muscle side' (ipsilateral / contralateral) and 'muscle' (RA / OE / OI / ES1 / ES2 / MF1 / MF2)
